# Supplementary material for: A photo-responsive self-healing hydrogel loaded with immunoadjuvants and MoS2 nanosheets for combating post-resection breast cancer recurrence
Source: Royal Society of Chemistry journal article supplement (doi:10.1039/d4nr00372a), 2024-01-01
Supplement: d4nr00372a1.pdf [file d4nr00372a1.pdf]

## Supplementary Information

### **Photo-responsive self-healing hydrogel loaded with immunoadjuvants and MoS<sub>2</sub> nanosheets for combating post-resection breast cancer recurrence**

Siyu Wang,<sup>a</sup> Zhuoping Qian,<sup>a</sup> Huaxin Xiao,<sup>a</sup> Guangwen Yang,<sup>b</sup> Ziyi Zhu,<sup>a</sup> Yubin Gu,<sup>a</sup> Junjie Song,<sup>a</sup> Xin Zhang,<sup>a</sup> Xinxuan Huang,<sup>a</sup> Lixing Weng,<sup>a</sup> Yu Gao,<sup>a\*</sup> Wenjing Yang,<sup>a\*</sup> Lianhui Wang<sup>a\*</sup>

<sup>a</sup>State Key Laboratory for Organic Electronics and Information Displays & Jiangsu Key Laboratory for Biosensors, Institute of Advanced Materials (IAM), Jiangsu National Synergistic Innovation Center for Advanced Materials (SICAM), Nanjing University of Posts & Telecommunications, Nanjing 210023, China

<sup>b</sup>Nanjing Stomatological Hospital, Affiliated Hospital of Medical School, Nanjing University, Nanjing, Jiangsu 210008, China.

\*Correspondence: [iamygao@njupt.edu.cn](mailto:iamygao@njupt.edu.cn), [iamwjyang@njupt.edu.cn](mailto:iamwjyang@njupt.edu.cn), [iamlhwan@njupt.edu.cn](mailto:iamlhwang@njupt.edu.cn)

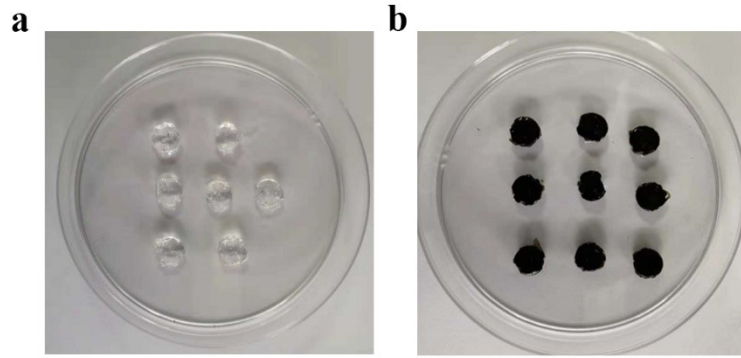

**Supplementary Fig. 1** Representative photograph of the PVA hydrogel (a) and PMR hydrogel (b).

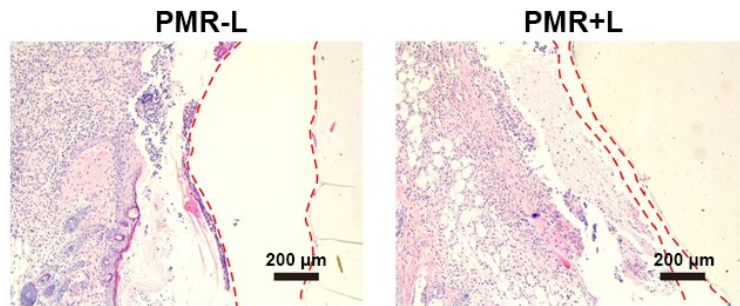

**Supplementary Fig. 2** H&E staining of subcutaneous tissue with PMR hydrogel with (right) or without NIR irradiation (left).

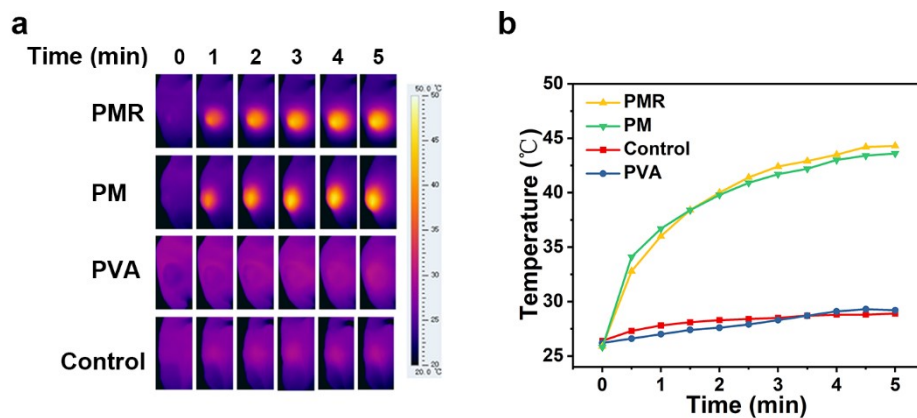

**Supplementary Fig. 3** In vivo photothermal performance in a mouse model. (a) Infrared radiation (IR) thermal images at the subcutaneous area of mice under NIR irradiation. (b) Real-time temperature profiles.

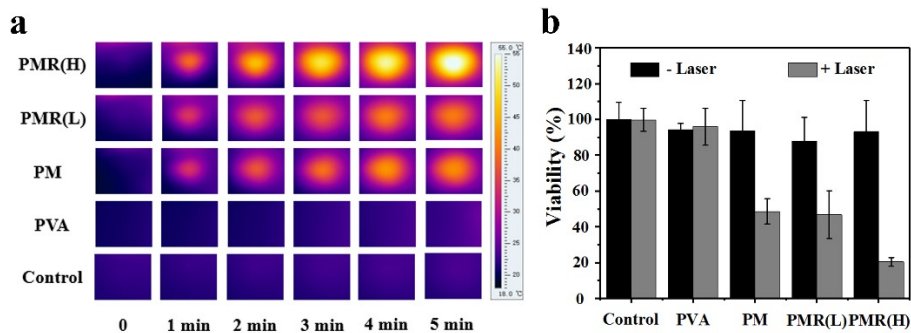

**Supplementary Fig. 4** Biocompatibility of the self-healing hydrogel and the photothermal induced cytotoxicity to cancer cells. **(a)** Infrared radiation (IR) thermal images of the different hydrogels after incubation with 4T1 cell under NIR irradiation. **(b)** Cell viability of different hydrogels after incubation with 4T1 cell under NIR irradiation.

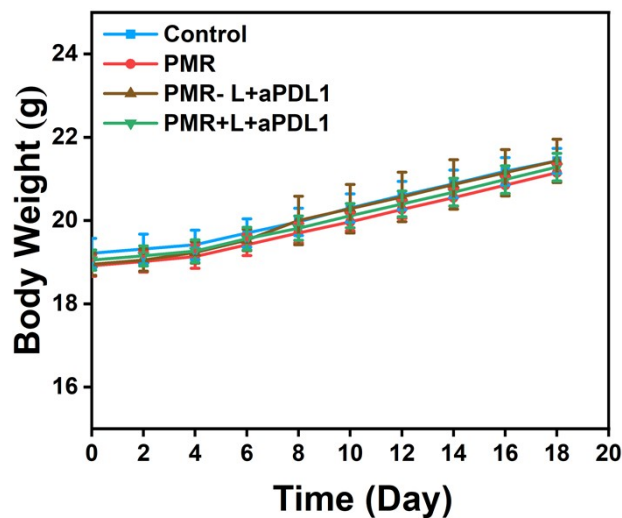

**Supplementary Fig. 5** Time-dependent body weight of mice after different treatments.

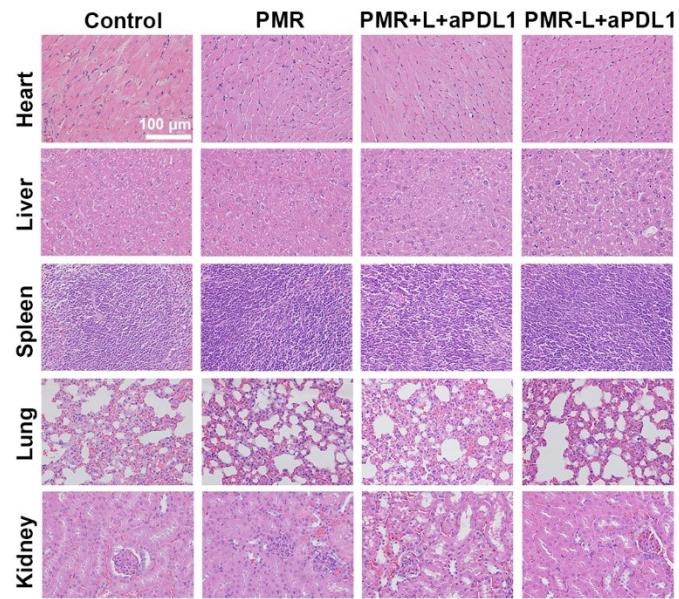

**Supplementary Fig. 6** Histological analysis of the major organs (heart, liver, spleen, lungs, and kidneys) collected from the mice with different treatments. Scale bar: 100  $\mu\text{m}$ .
